# Supplementary material
Source: PubMed Central journal article supplement (PMC3438847)
Supplement: Supp_Fig1.pdf [file Supp_Fig1.pdf]

## Supplementary Data

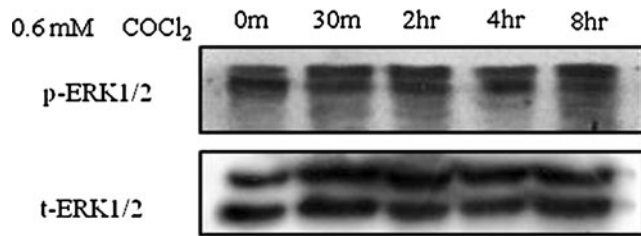

**SUPPLEMENTARY FIG. S1.** CoCl<sub>2</sub> treatment has no effect on p-ERK1/2 pathway. Representative pictures of western blotting of p-ERK1/2 and ERK1/2 in PC12 cells treated with 0.6mM CoCl<sub>2</sub> at the indicated time points ( $n=2$ ).
